# Supplementary material for: Partial inhibition of glyceraldehyde-3-phosphate dehydrogenase translation by gentamicin in the attenuated Leishmania major: structure study
Source: Research Square preprint supplement (doi:10.21203/rs.3.rs-8708309/v1), 2026-01-30
Supplement: Supplementary file 1 [file 6817bdd514030fb2de7e94af.docx]

Report Mass Spectrometry Analysis Protein Identification

The identified proteins in each of the spots can be seen in the following Tables, where **N** is the Protein rank in the sample according to the number of good peptides; **Unused** is the Score computed by the software according to the number of good peptides (the higher the score, the higher the confidence that this protein was identified.); **%Cov** is the Coverage percentage; **Accession** is the Protein identification tag that can be used to search in Uniprot; **Name** is the Protein name; **Species** is the Protein species; and **Peptides(95%)** is the Number of the identified peptides with a confidence higher than 95%.

Proteins considered as contaminants are highlighted in yellow. Proteins of interest are highlighted in green.

| Sample *Leishmania major* Wild-type | | | | | | | | | |
| --- | --- | --- | --- | --- | --- | --- | --- | --- | --- |
| **N** | **Unused** | | **% Cov** | | **Accession #** | | **Name** | **Peptides (95%)** | |
| 1 | 47.48 | | 41.5 | | cont_sp|K2C1_HUM  AN| | | cont_sp|K2C1_HUMAN| | 33 | |
| 2 | 40.31 | | 36.8 | | cont_sp|K1C10_HU  MAN| | | cont_sp|K1C10_HUMAN| | 22 | |
| 3 | 36.96 | | 43.3 | | cont_sp|K22E_HUM  AN| | | cont_sp|K22E_HUMAN| | 23 | |
| 4 | 31.01 | | 64.2 | | tr|Q4Q9N8|Q4Q9N8  _LEIMA | | Putative 2,4-dihydroxyhept-2-ene- 1,7-dioic acid aldolase  OS=Leishmania major OX=5664 GN=LMJF_25_2010 PE=4 SV=1 | 36 | |
| 5 | 28.18 | | 46.8 | | tr|Q4Q6Z5|Q4Q6Z5_ LEIMA | | Glyceraldehyde-3-phosphate dehydrogenase OS=Leishmania major OX=5664 GN=LMJF_30_2970 PE=3  SV=1 | 17 | |
| 6 | 26.58 | | 47 | | cont_sp|K1C9_HUM  AN| | | cont_sp|K1C9_HUMAN| | 21 | |
| 7 | 23.32 | | 22.2 | | tr|Q4Q3T3|Q4Q3T3_  LEIMA | | Metallo-peptidase, Clan MA(E),  Family M32 OS=Leishmania major | 13 | |
|  |  |  | |  | | OX=5664 GN=LMJF_33_2540 PE=4  SV=1 | |  | |
| 8 | 21.74 | 78 | | tr|Q4QJG4|Q4QJG4_ LEIMA | | Putative microtubule-associated protein OS=Leishmania major OX=5664 GN=LMJF_05_0380 PE=4  SV=1 | | 14 | |
| 9 | 17.01 | 48.2 | | tr|Q4QF80|Q4QF80_ LEIMA | | Tryparedoxin peroxidase  OS=Leishmania major OX=5664 GN=TRYP1 PE=4 SV=1 | | 15 | |
| 10 | 16.52 | 29.2 | | tr|Q4Q4U1|Q4Q4U1  _LEIMA | | Dihydrolipoyl dehydrogenase OS=Leishmania major OX=5664 GN=GCVL-2 PE=3 SV=1 | | 12 | |
| 11 | 14.93 | 36.2 | | tr|Q4Q4U6|Q4Q4U6  _LEIMA | | Glucosamine-6-phosphate isomerase OS=Leishmania major OX=5664  GN=LMJF_32_3260 PE=3 SV=1 | | 12 | |
| 12 | 14.57 | 14.9 | | tr|Q4QH17|Q4QH17  _LEIMA | | Putative aminopeptidase  OS=Leishmania major OX=5664 GN=LMJF_11_0630 PE=1 SV=1 | | 9 | |
| 13 | 10.57 | 14.5 | | tr|Q4QJG7|Q4QJG7_ LEIMA | | Trypanothione reductase OS=Leishmania major OX=5664  GN=TRYR PE=3 SV=1 | | 5 | |
| 14 | 10.05 | 25.1 | | cont_sp|TRYP_PIG| | | cont_sp|TRYP_PIG| | | 24 | |
| 15 | 10 | 23.4 | | tr|Q4Q159|Q4Q159_ LEIMA | | Cysteine synthase OS=Leishmania  major OX=5664 GN=LMJF_36_3590 PE=1 SV=1 | | 5 | |
| 16 | 9.63 | 21.2 | | tr|Q4Q843|Q4Q843_ LEIMA | | Putative glycoprotein 96-92 OS=Leishmania major OX=5664  GN=LMJF_28_2210 PE=4 SV=1 | | 5 | |
| 17 | 8.77 | 14.8 | | tr|O97193|O97193_L  EIMA | | FBP protein OS=Leishmania major  OX=5664 GN=FBP PE=1 SV=1 | | 5 | |
| 18 | 7.36 | 13.1 | | sp|E9AD19|RBSK_L EIMA | | Ribokinase OS=Leishmania major OX=5664 GN=LMJF_27_0420 PE=1  SV=1 | | 4 | |
| 19 | 6.41 | 24.2 | | sp|P69201|RL40_LEI MA | | Ubiquitin-60S ribosomal protein L40  OS=Leishmania major OX=5664 GN=UB-EP52 PE=3 SV=2 | | 4 | |
| 20 | 6 | 25.2 | | tr|Q9U1E1|Q9U1E1_ LEIMA | | Nucleoside diphosphate kinase OS=Leishmania major OX=5664  GN=L1648.07 PE=1 SV=1 | | 3 | |
| 21 | 6 | 10.4 | | tr|Q4Q3J4|Q4Q3J4_L EIMA | | Malate dehydrogenase  OS=Leishmania major OX=5664 GN=LMJF_34_0140 PE=3 SV=1 | | 3 | |
| 22 | 6 | 8.2 | | tr|E9AE98|E9AE98_ LEIMA | | Aspartyl putative aminopeptidase OS=Leishmania major OX=5664  GN=LMJF_29_2360 PE=3 SV=1 | | 3 | |
| 23 | 5.49 | 15.5 | | tr|Q4QD68|Q4QD68  _LEIMA | | Cysteine peptidase A (CPA) OS=Leishmania major OX=5664  GN=CPA PE=3 SV=1 | | 6 | |
| 24 | 5.38 | 15.1 | | tr|E9ACZ6|E9ACZ6_ LEIMA | | Proteasome endopeptidase complex  OS=Leishmania major OX=5664 GN=LMJF_27_0190 PE=3 SV=1 | | 3 | |
| 25 | 4.75 | 8.8 | | tr|Q4QJB9|Q4QJB9_ LEIMA | | S-methyl-5'-thioadenosine phosphorylase OS=Leishmania major OX=5664 GN=LMJF_05_0830 PE=3  SV=1 | | 2 | |
| 26 | 4.48 | 5.1 | | tr|Q4Q3T0|Q4Q3T0_ LEIMA | | Putative aminopeptidase  OS=Leishmania major OX=5664 GN=LMJF_33_2570 PE=4 SV=1 | | 2 | |
| 27 | 4.02 | 10.9 | | tr|Q4QI68|Q4QI68_L EIMA | | Cathepsin L-like protease OS=Leishmania major OX=5664 GN=LMJF_08_1010 PE=3 SV=1 | | 5 | |
| 28 | 3.83 | 3.1 | | tr|Q4QFI9|Q4QFI9_L EIMA | | Uncharacterized protein OS=Leishmania major OX=5664  GN=LMJF_14_1440 PE=4 SV=1 | | 2 | |
| 29 | 3.61 | 8.7 | | tr|Q4Q7N0|Q4Q7N0  _LEIMA | | Putative 4-methyl-5(Beta- hydroxyethyl)-thiazole monophosphate synthesis protein  OS=Leishmania major OX=5664 GN=LMJF_30_0750 PE=4 SV=1 | | 2 | |
| 30 | 3.21 | 4.1 | | tr|Q4Q0V0|Q4Q0V0  _LEIMA | | Uncharacterized protein OS=Leishmania major OX=5664 GN=LMJF_36_4640 PE=4 SV=1 | | 2 | |
| 31 | 3.06 | 8.9 | | tr|Q4QDN1|Q4QDN1  _LEIMA | | Nonspecific nucleoside hydrolase OS=Leishmania major OX=5664  GN=NH PE=4 SV=1 | | 3 | |
| 32 | 2.97 | 7.5 | | tr|Q4QFL8|Q4QFL8_  LEIMA | | Enolase OS=Leishmania major  OX=5664 GN=ENOL PE=3 SV=1 | | 2 | |
| 33 | 2.55 | 2.1 | | tr|Q4QFJ8|Q4QFJ8_ LEIMA | | Inositol-3-phosphate synthase  OS=Leishmania major OX=5664 GN=INO1 PE=4 SV=1 | | 1 | |
| 34 | 2.36 | 1.6 | | tr|Q4Q673|Q4Q673_ LEIMA | | Peptidase m20/m25/m40 family-like protein OS=Leishmania major OX=5664 GN=LMJF_31_1890 PE=4  SV=1 | | 1 | |
| 35 | 2.01 | 7.3 | | cont_sp|K1C15_SHE EP| | | cont_sp|K1C15_SHEEP| | | 3 | |
| 36 | 2 | 5.2 | | tr|Q4QFW7|Q4QFW 7_LEIMA | | Putative carboxypeptidase  OS=Leishmania major OX=5664 GN=LMJF_14_0180 PE=4 SV=1 | | 2 | |
| 37 | 2 | 60.2 | | tr|Q4QEL9|Q4QEL9  _LEIMA | | Putative kinesin OS=Leishmania major OX=5664 GN=LMJF_16_1460  PE=3 SV=1 | | 1 | |
| 38 | 2 | 3.1 | | tr|Q9U0V4|Q9U0V4  _LEIMA | | Uncharacterized protein L7836.08  OS=Leishmania major OX=5664 GN=L7836.08 PE=4 SV=1 | | 1 | |
| 39 | 2 | 11.6 | | tr|Q4QBL5|Q4QBL5  _LEIMA | | Uncharacterized protein OS=Leishmania major OX=5664  GN=LMJF_22_1320 PE=4 SV=1 | | 1 | |
| 40 | 2 | 3.8 | | tr|Q4QAB9|Q4QAB9  _LEIMA | | Uncharacterized protein OS=Leishmania major OX=5664  GN=LMJF_24_2110 PE=4 SV=1 | | 1 | |
| 41 | 2 | 5 | | tr|Q4Q150|Q4Q150_ LEIMA | | Nudix hydrolase-like protein  OS=Leishmania major OX=5664 GN=LMJF_36_3660 PE=4 SV=1 | | 1 |
| 42 | 2 | 4.8 | | tr|E9AFW0|E9AFW0  _LEIMA | | Proteasome subunit alpha type OS=Leishmania major OX=5664  GN=LMJF_35_4850 PE=3 SV=1 | | 1 |
| 43 | 1.85 | 1.9 | | tr|E9AE57|E9AE57_ LEIMA | | Putative fumarate hydratase  OS=Leishmania major OX=5664 GN=LMJF_29_1960 PE=1 SV=1 | | 1 |
| 44 | 1.51 | 4.9 | | tr|Q4QC00|Q4QC00_ LEIMA | | Proteasome subunit alpha type OS=Leishmania major OX=5664 GN=LMJF_21_1830 PE=3 SV=1 | | 1 |
| 45 | 1.49 | 38.4 | | tr|E9AD01|E9AD01_ LEIMA | | Kinetoplast-associated protein-like protein OS=Leishmania major  OX=5664 GN=LMJF_27_0240 PE=4 SV=1 | | 1 |
| 46 | 1.32 | 5.6 | | tr|Q4Q6T6|Q4Q6T6_ LEIMA | | S-adenosylmethionine synthase OS=Leishmania major OX=5664  GN=METK2 PE=3 SV=1 | | 2 |
| 47 | 1.3 | 3.2 | | tr|Q4QH67|Q4QH67  _LEIMA | | NGG1 interacting factor 3-like protein OS=Leishmania major OX=5664 GN=LMJF_11_0130 PE=4  SV=1 | | 1 |
| 48 | 1.1 | 3.2 | | tr|E9AFQ3|E9AFQ3_ LEIMA | | Uncharacterized protein OS=Leishmania major OX=5664  GN=LMJF_35_4260 PE=4 SV=1 | | 1 |
| 49 | 1 | 1.2 | | tr|Q9U0T9|Q9U0T9_ LEIMA | | Putative calpain-like cysteine peptidase OS=Leishmania major OX=5664 GN=LMJF_04_0450 PE=3  SV=1 | | 1 |
| 50 | 0.97 | 1.7 | | tr|Q4Q7Y4|Q4Q7Y4  _LEIMA | | Putative heat-shock protein hsp70  OS=Leishmania major OX=5664 GN=LMJF_28_2770 PE=3 SV=1 | | 1 |
| 51 | 0.91 | 1.4 | | tr|Q4QI25|Q4QI25_L EIMA | | Uncharacterized protein OS=Leishmania major OX=5664 GN=LMJF_09_0100 PE=4 SV=1 | | 1 |
| 52 | 0.88 | 3.6 | | tr|Q4Q597|Q4Q597_ LEIMA | | Superoxide dismutase OS=Leishmania major OX=5664  GN=SODB1 PE=3 SV=1 | | 1 |
| 53 | 0.79 | 1.6 | | RRRRRtr|Q4Q8R3|Q 4Q8R3_LEIMA | | REVERSED Uncharacterized protein  OS=Leishmania major OX=5664 GN=LMJF_28_0070 PE=4 SV=1 | | 1 |
|  | | | | | | | | |
|  | | | | | | | | |
| **Sample *Leishmania major* H-line** | | | | | | | | |
| N | Unused | % Cov  (95) | | Accession # | | Name | | Peptides  (95%) |
| 1 | 30.65 | 27 | | tr|Q4QAB9|Q4QAB9  _LEIMA | | Uncharacterized protein OS=Leishmania major OX=5664  GN=LMJF_24_2110 PE=4 SV=1 | | 27 |
| 2 | 27.97 | 61.7 | | tr|Q4Q9N8|Q4Q9N8  _LEIMA | | Putative 2,4-dihydroxyhept-2-ene-  1,7-dioic acid aldolase | | 37 |
|  |  |  | |  | | OS=Leishmania major OX=5664  GN=LMJF_25_2010 PE=4 SV=1 | |  |
| 3 | 24 | 66.4 | | tr|Q4QC00|Q4QC00_ LEIMA | | Proteasome subunit alpha type  OS=Leishmania major OX=5664 GN=LMJF_21_1830 PE=3 SV=1 | | 18 |
| 4 | 22.78 | 17.4 | | tr|Q4Q259|Q4Q259_ LEIMA | | Elongation factor 2 OS=Leishmania major OX=5664 GN=EF2-2 PE=4  SV=1 | | 12 |
| 5 | 22.02 | 29 | | tr|Q4QI80|Q4QI80_L EIMA | | Mitochondrial DNA polymerase beta  OS=Leishmania major OX=5664 GN=LMJF_08_0890 PE=4 SV=1 | | 12 |
| 6 | 21.83 | 22.5 | | tr|Q4QI58|Q4QI58_L EIMA | | Stress-induced protein sti1 OS=Leishmania major OX=5664  GN=LMJF_08_1110 PE=4 SV=1 | | 13 |
| 7 | 21.75 | 51.7 | | tr|Q4Q1R5|Q4Q1R5_ LEIMA | | Proteasome subunit alpha type OS=Leishmania major OX=5664  GN=LMJF_36_1600 PE=3 SV=1 | | 14 |
| 8 | 19.78 | 17 | | tr|Q4Q7Y4|Q4Q7Y4  _LEIMA | | Putative heat-shock protein hsp70  OS=Leishmania major OX=5664 GN=LMJF_28_2770 PE=3 SV=1 | | 14 |
| 9 | 18.77 | 18 | | cont_sp|K2C1_HUM  AN| | | cont_sp|K2C1_HUMAN| | | 10 |
| 10 | 17.64 | 18.6 | | tr|Q4Q1M1|Q4Q1M1  _LEIMA | | Chaperonin HSP60, mitochondrial OS=Leishmania major OX=5664  GN=LMJF_36_2020 PE=3 SV=1 | | 14 |
| 11 | 17.52 | 15.9 | | tr|Q4Q745|Q4Q745_ LEIMA | | Putative heat shock 70-related protein 1,mitochondrial OS=Leishmania major OX=5664 GN=LMJF_30_2470  PE=3 SV=1 | | 9 |
| 12 | 16.97 | 32.3 | | tr|Q4Q6F6|Q4Q6F6_ LEIMA | | Biotin/lipoate protein ligase-like protein OS=Leishmania major OX=5664 GN=LMJF_31_1070 PE=4  SV=1 | | 8 |
| 13 | 16.85 | 38.1 | | tr|Q4QBR9|Q4QBR9  _LEIMA | | NADH-cytochrome b5 reductase OS=Leishmania major OX=5664  GN=LMJF_22_0780 PE=3 SV=1 | | 12 |
| 14 | 14.6 | 29.2 | | tr|E9AFW0|E9AFW0  _LEIMA | | Proteasome subunit alpha type OS=Leishmania major OX=5664  GN=LMJF_35_4850 PE=3 SV=1 | | 9 |
| 15 | 14.19 | 41.9 | | tr|Q4Q4U6|Q4Q4U6  _LEIMA | | Glucosamine-6-phosphate isomerase  OS=Leishmania major OX=5664 GN=LMJF_32_3260 PE=3 SV=1 | | 8 |
| 16 | 12.22 | 43.9 | | tr|Q4Q3J4|Q4Q3J4_L EIMA | | Malate dehydrogenase OS=Leishmania major OX=5664  GN=LMJF_34_0140 PE=3 SV=1 | | 12 |
| 17 | 12.18 | 43.8 | | tr|Q4QJB9|Q4QJB9_ LEIMA | | S-methyl-5'-thioadenosine phosphorylase OS=Leishmania major OX=5664 GN=LMJF_05_0830 PE=3  SV=1 | | 12 |
| 18 | 12.01 | 24.3 | | tr|Q4QDQ1|Q4QDQ1  _LEIMA | | Putative pyruvate dehydrogenase E1  component alpha subunit | | 7 |
|  |  |  | |  | | OS=Leishmania major OX=5664  GN=LMJF_18_1380 PE=4 SV=1 | |  |
| 19 | 12 | 20.8 | | tr|Q4Q1M0|Q4Q1M0  _LEIMA | | Chaperonin HSP60, mitochondrial  OS=Leishmania major OX=5664 GN=LMJF_36_2030 PE=3 SV=1 | | 13 |
| 20 | 12 | 24.3 | | tr|Q4Q159|Q4Q159_ LEIMA | | Cysteine synthase OS=Leishmania major OX=5664 GN=LMJF_36_3590  PE=1 SV=1 | | 6 |
| 21 | 12 | 16.7 | | tr|Q4Q884|Q4Q884_ LEIMA | | Replication protein A subunit  OS=Leishmania major OX=5664 GN=RPA1 PE=3 SV=1 | | 6 |
| 22 | 11.96 | 20.8 | | tr|Q4QDF0|Q4QDF0  _LEIMA | | Glycosomal malate dehydrogenase OS=Leishmania major OX=5664  GN=gMDH PE=3 SV=1 | | 7 |
| 23 | 11.85 | 11.7 | | tr|Q4Q970|Q4Q970_ LEIMA | | Heat shock protein 70-related protein OS=Leishmania major OX=5664  GN=HSP70.4 PE=3 SV=1 | | 6 |
| 24 | 11.78 | 39.9 | | tr|E9ACZ6|E9ACZ6_ LEIMA | | Proteasome endopeptidase complex  OS=Leishmania major OX=5664 GN=LMJF_27_0190 PE=3 SV=1 | | 9 |
| 25 | 11.25 | 32.2 | | tr|Q4Q271|Q4Q271_ LEIMA | | Stress-inducible protein STI1 homolog OS=Leishmania major OX=5664 GN=LMJF_36_0070 PE=4  SV=1 | | 7 |
| 26 | 10.71 | 33 | | tr|Q4QFH9|Q4QFH9  _LEIMA | | NADH-cytochrome b5 reductase OS=Leishmania major OX=5664  GN=LMJF_15_0050 PE=3 SV=1 | | 9 |
| 27 | 10.28 | 33.7 | | tr|Q4Q8Q9|Q4Q8Q9  _LEIMA | | Proteasome subunit beta type OS=Leishmania major OX=5664  GN=LMJF_28_0110 PE=3 SV=1 | | 6 |
| 28 | 9.9 | 7.1 | | tr|E9AEU1|E9AEU1  _LEIMA | | Putative NADH-dependent fumarate reductase OS=Leishmania major OX=5664 GN=LMJF_35_1180 PE=4  SV=1 | | 9 |
| 29 | 9.73 | 30.1 | | tr|Q4QBS0|Q4QBS0  _LEIMA | | Putative NADH-cytochrome b5 reductase OS=Leishmania major  OX=5664 GN=LMJF_22_0770 PE=4 SV=1 | | 12 |
| 30 | 9.46 | 33.6 | | tr|Q4QCC2|Q4QCC2  _LEIMA | | Xanthine phosphoribosyltransferase OS=Leishmania major OX=5664  GN=XRPT PE=4 SV=1 | | 9 |
| 31 | 9.35 | 12.2 | | tr|E9AF10|E9AF10_ LEIMA | | Putative 60S ribosomal protein L5  OS=Leishmania major OX=5664 GN=LMJF_35_1890 PE=3 SV=1 | | 5 |
| 32 | 9.12 | 14.6 | | tr|Q4Q1V0|Q4Q1V0  _LEIMA | | Fructose-bisphosphate aldolase OS=Leishmania major OX=5664  GN=ALD PE=3 SV=1 | | 6 |
| 33 | 9.09 | 10.9 | | tr|Q4Q090|Q4Q090_ LEIMA | | 2,3-bisphosphoglycerate-independent phosphoglycerate mutase OS=Leishmania major OX=5664  GN=PGAM PE=4 SV=1 | | 5 |
| 34 | 8.87 | 8.6 | | tr|Q4Q3T3|Q4Q3T3_ LEIMA | | Metallo-peptidase, Clan MA(E), Family M32 OS=Leishmania major OX=5664 GN=LMJF_33_2540 PE=4  SV=1 | | 4 |
| 35 | 8.61 | 9.9 | | tr|Q4QJF1|Q4QJF1_ LEIMA | | ATPase alpha subunit  OS=Leishmania major OX=5664 GN=LMJF_05_0500 PE=4 SV=1 | | 5 |
| 36 | 8.6 | 32 | | tr|E9AEL3|E9AEL3_ LEIMA | | Enoyl-CoA hydratase/isomerase family protein,conserved OS=Leishmania major OX=5664  GN=LMJF_35_0360 PE=4 SV=1 | | 7 |
| 37 | 8.31 | 13 | | tr|Q4QD53|Q4QD53  _LEIMA | | Inosine-5'-monophosphate dehydrogenase OS=Leishmania major OX=5664 GN=LMJF_19_1560 PE=3  SV=1 | | 6 |
| 38 | 8.15 | 5.8 | | tr|E9AF31|E9AF31_ LEIMA | | Putative calcium motive P-type ATPase OS=Leishmania major OX=5664 GN=LMJF_35_2080 PE=3  SV=1 | | 5 |
| 39 | 8.14 | 28.9 | | tr|Q4QEQ4|Q4QEQ4  _LEIMA | | Tyrosyl or methionyl-tRNA synthetase-like protein OS=Leishmania major OX=5664  GN=LMJF_16_1130 PE=4 SV=1 | | 5 |
| 40 | 8.06 | 13.4 | | tr|Q9NGR0|Q9NGR0  _LEIMA | | 6-phosphogluconate dehydrogenase, decarboxylating (Fragment)  OS=Leishmania major OX=5664 GN=gnd PE=3 SV=2 | | 4 |
| 41 | 8 | 10.9 | | tr|Q4QCF1|Q4QCF1  _LEIMA | | Putative phosphoglucomutase OS=Leishmania major OX=5664 GN=LMJF_21_0640 PE=1 SV=1 | | 6 |
| 42 | 8 | 9.3 | | tr|Q4Q9X6|Q4Q9X6  _LEIMA | | ATP synthase subunit beta OS=Leishmania major OX=5664  GN=LMJF_25_1170 PE=3 SV=1 | | 4 |
| 43 | 8 | 15.8 | | tr|Q4Q225|Q4Q225_ LEIMA | | Protein phosphatase 2C-like protein  OS=Leishmania major OX=5664 GN=LMJF_36_0530 PE=4 SV=1 | | 4 |
| 44 | 8 | 5.9 | | tr|E9ACJ7|E9ACJ7_ LEIMA | | Uncharacterized protein OS=Leishmania major OX=5664  GN=LMJF_03_0520 PE=4 SV=1 | | 4 |
| 45 | 7.81 | 7.6 | | tr|E9AE57|E9AE57_ LEIMA | | Putative fumarate hydratase  OS=Leishmania major OX=5664 GN=LMJF_29_1960 PE=1 SV=1 | | 5 |
| 46 | 7.8 | 11.6 | | tr|Q4Q3K2|Q4Q3K2  _LEIMA | | Ascorbate peroxidase OS=Leishmania major OX=5664 GN=APX PE=1 SV=1 | | 4 |
| 47 | 7.69 | 7.8 | | tr|Q4Q5S8|Q4Q5S8_ LEIMA | | Glycylpeptide N- tetradecanoyltransferase  OS=Leishmania major OX=5664 GN=NMT PE=1 SV=1 | | 4 |
| 48 | 7.2 | 12 | | tr|Q4Q673|Q4Q673_  LEIMA | | Peptidase m20/m25/m40 family-like  protein OS=Leishmania major | | 7 |
|  |  |  | |  | | OX=5664 GN=LMJF_31_1890 PE=4  SV=1 | |  |
| 49 | 6.98 | 17.1 | | tr|Q4QCC3|Q4QCC3  _LEIMA | | Hypoxanthine phosphoribosyltransferase OS=Leishmania major OX=5664  GN=HGPRT PE=3 SV=1 | | 4 |
| 50 | 6.96 | 18.1 | | tr|E9AES2|E9AES2_ LEIMA | | Putative aldose 1-epimerase  OS=Leishmania major OX=5664 GN=LMJF_35_0970 PE=4 SV=1 | | 6 |
| 51 | 6.92 | 27.9 | | tr|Q4Q1M7|Q4Q1M7  _LEIMA | | Phosphomannomutase OS=Leishmania major OX=5664 GN=PMM PE=3 SV=1 | | 6 |
| 52 | 6.32 | 6.1 | | cont_sp|K1C10_HU  MAN| | | cont_sp|K1C10_HUMAN| | | 3 |
| 53 | 6.29 | 29.4 | | cont_sp|TRYP_PIG| | | cont_sp|TRYP_PIG| | | 15 |
| 54 | 6.03 | 45.1 | | tr|Q4QJG4|Q4QJG4_ LEIMA | | Putative microtubule-associated protein OS=Leishmania major OX=5664 GN=LMJF_05_0380 PE=4  SV=1 | | 7 |
| 55 | 5.96 | 11.8 | | tr|Q4Q6Y1|Q4Q6Y1  _LEIMA | | Uncharacterized protein OS=Leishmania major OX=5664  GN=LMJF_30_3090 PE=4 SV=1 | | 3 |
| 56 | 5.89 | 14.9 | | tr|Q4QFL8|Q4QFL8_  LEIMA | | Enolase OS=Leishmania major  OX=5664 GN=ENOL PE=3 SV=1 | | 4 |
| 57 | 5.77 | 23.2 | | tr|E9AEU6|E9AEU6  _LEIMA | | Putative short chain dehydrogenase  OS=Leishmania major OX=5664 GN=LMJF_35_1230 PE=4 SV=1 | | 5 |
| 58 | 5.68 | 11.4 | | tr|Q4Q0E2|Q4Q0E2_ LEIMA | | Uncharacterized protein OS=Leishmania major OX=5664 GN=LMJF_36_6180 PE=4 SV=1 | | 3 |
| 59 | 5.59 | 10.6 | | tr|Q4QEU3|Q4QEU3  _LEIMA | | Transaldolase OS=Leishmania major OX=5664 GN=LMJF_16_0760 PE=3  SV=1 | | 3 |
| 60 | 5.53 | 10.3 | | tr|Q4QC88|Q4QC88_ LEIMA | | Cell division protein kinase 2  OS=Leishmania major OX=5664 GN=CRK1 PE=3 SV=1 | | 3 |
| 61 | 5.29 | 10.1 | | tr|Q4QAT9|Q4QAT9  _LEIMA | | Ubiquitin carboxyl-terminal hydrolase OS=Leishmania major OX=5664 GN=LMJF_24_0420 PE=3  SV=1 | | 3 |
| 62 | 5.27 | 9.6 | | tr|Q4Q6F0|Q4Q6F0_ LEIMA | | Putative N-acyl-L-amino acid amidohydrolase OS=Leishmania major OX=5664 GN=LMJF_31_1130  PE=4 SV=1 | | 3 |
| 63 | 5.11 | 9.8 | | tr|Q4QGS1|Q4QGS1  _LEIMA | | Putative hydroxyacylglutathione hydrolase OS=Leishmania major OX=5664 GN=LMJF_12_0220 PE=4  SV=1 | | 3 |
| 64 | 5.01 | 9.3 | | tr|Q4Q720|Q4Q720_  LEIMA | | Putative small glutamine-rich  tetratricopeptide repeat protein | | 3 |
|  |  |  | |  | | OS=Leishmania major OX=5664  GN=SGT PE=4 SV=1 | |  |
| 65 | 4.99 | 15.3 | | tr|E9AEQ0|E9AEQ0  _LEIMA | | Putative proteasome activator protein pa26 OS=Leishmania major OX=5664 GN=LMJF_35_0750 PE=4  SV=1 | | 3 |
| 66 | 4.87 | 5.5 | | tr|Q4QEL7|Q4QEL7  _LEIMA | | Uncharacterized protein  OS=Leishmania major OX=5664 GN=LMJF_16_1480 PE=4 SV=1 | | 4 |
| 67 | 4.81 | 14.1 | | tr|Q4Q6Z5|Q4Q6Z5_ LEIMA | | Glyceraldehyde-3-phosphate dehydrogenase OS=Leishmania major OX=5664 GN=LMJF_30_2970 PE=3  SV=1 | | 3 |
| 68 | 4.69 | 5 | | tr|Q4QA83|Q4QA83  _LEIMA | | Putative elongation factor  OS=Leishmania major OX=5664 GN=LMJF_25_0130 PE=4 SV=1 | | 2 |
| 69 | 4.56 | 5.7 | | tr|Q4Q124|Q4Q124_ LEIMA | | Adenosylhomocysteinase OS=Leishmania major OX=5664  GN=LMJF_36_3910 PE=1 SV=1 | | 2 |
| 70 | 4.23 | 8 | | tr|Q95Z84|Q95Z84_L EIMA | | Spermidine synthase OS=Leishmania  major OX=5664 GN=LMJF_04_0580 PE=3 SV=1 | | 2 |
| 71 | 4.2 | 10.9 | | tr|Q4Q8C9|Q4Q8C9_ LEIMA | | Putative haloacid dehalogenase-like hydrolase OS=Leishmania major OX=5664 GN=LMJF_28_1370 PE=4  SV=1 | | 2 |
| 72 | 4.19 | 8.6 | | tr|Q4QGU3|Q4QGU3  _LEIMA | | Putative translation initiation factor EIF-2b alpha subunit OS=Leishmania major OX=5664 GN=LMJF_12_0010  PE=3 SV=1 | | 3 |
| 73 | 4.16 | 2 | | tr|Q4Q5I7|Q4Q5I7_L EIMA | | Uncharacterized protein  OS=Leishmania major OX=5664 GN=LMJF_32_0950 PE=4 SV=1 | | 2 |
| 74 | 4.13 | 4.5 | | tr|E9AF59|E9AF59_ LEIMA | | Putative aminopeptidase P OS=Leishmania major OX=5664 GN=LMJF_35_2350 PE=3 SV=1 | | 2 |
| 75 | 4.08 | 18.1 | | tr|Q4QF80|Q4QF80_ LEIMA | | Tryparedoxin peroxidase OS=Leishmania major OX=5664  GN=TRYP1 PE=4 SV=1 | | 4 |
| 76 | 4.07 | 13.4 | | tr|Q4QH56|Q4QH56  _LEIMA | | Proteasome subunit alpha type  OS=Leishmania major OX=5664 GN=LMJF_11_0240 PE=3 SV=1 | | 2 |
| 77 | 4.01 | 3.6 | | tr|Q4QFI0|Q4QFI0_L EIMA | | Uncharacterized protein OS=Leishmania major OX=5664  GN=LMJF_15_0040 PE=4 SV=1 | | 2 |
| 78 | 4 | 10.8 | | tr|Q4QDN1|Q4QDN1  _LEIMA | | Nonspecific nucleoside hydrolase OS=Leishmania major OX=5664  GN=NH PE=4 SV=1 | | 3 |
| 79 | 4 | 9.7 | | tr|Q4Q8S1|Q4Q8S1_ LEIMA | | 6-phosphogluconolactonase  OS=Leishmania major OX=5664 GN=LMJF_26_2700 PE=4 SV=1 | | 2 |
| 80 | 4 | 3.6 | | tr|Q4Q3V0|Q4Q3V0  _LEIMA | | Uncharacterized protein  OS=Leishmania major OX=5664 GN=LMJF_33_2370 PE=4 SV=1 | | 2 |
| 81 | 4 | 18.5 | | tr|E9AD53|E9AD53_ LEIMA | | Putative small GTP-binding protein Rab1 OS=Leishmania major OX=5664 GN=LMJF_27_0760 PE=4  SV=1 | | 2 |
| 82 | 3.82 | 2.9 | | tr|E9AEW4|E9AEW4  _LEIMA | | Putative threonyl-tRNA synthetase OS=Leishmania major OX=5664 GN=LMJF_35_1410 PE=3 SV=1 | | 3 |
| 83 | 3.81 | 2.5 | | tr|Q4QJ76|Q4QJ76_L EIMA | | Uncharacterized protein OS=Leishmania major OX=5664  GN=LMJF_06_0030 PE=4 SV=1 | | 2 |
| 84 | 3.59 | 4.4 | | tr|Q4Q5P5|Q4Q5P5_ LEIMA | | Putative ATP-dependent RNA helicase OS=Leishmania major OX=5664 GN=LMJF_32_0400 PE=3  SV=2 | | 2 |
| 85 | 3.54 | 5 | | tr|Q4QIR7|Q4QIR7_ LEIMA | | Acetylornithine deacetylase-like protein OS=Leishmania major OX=5664 GN=LMJF_07_0270 PE=4  SV=1 | | 2 |
| 86 | 3.52 | 6.5 | | tr|E9ADI2|E9ADI2_ LEIMA | | D-lactate dehydrogenase-like protein OS=Leishmania major OX=5664  GN=LMJF_27_2020 PE=4 SV=1 | | 2 |
| 87 | 3.5 | 14.4 | | tr|Q4Q1W2|Q4Q1W2  _LEIMA | | Putative short chain 3-hydroxyacyl- CoA dehydrogenase OS=Leishmania major OX=5664 GN=LMJF_36_1140  PE=4 SV=1 | | 3 |
| 88 | 3.31 | 8.5 | | tr|E9ACP2|E9ACP2_ LEIMA | | Uncharacterized protein  OS=Leishmania major OX=5664 GN=LMJF_03_0970 PE=4 SV=1 | | 2 |
| 89 | 3.17 | 6.4 | | cont_sp|K22E_HUM  AN| | | cont_sp|K22E_HUMAN| | | 4 |
| 90 | 3.1 | 3.6 | | tr|Q4Q8E6|Q4Q8E6_ LEIMA | | Putative glucose-regulated protein 78 OS=Leishmania major OX=5664 GN=LMJF_28_1200 PE=3 SV=1 | | 2 |
| 91 | 2.92 | 4.2 | | tr|E9ADB1|E9ADB1  _LEIMA | | Uncharacterized protein OS=Leishmania major OX=5664  GN=LMJF_27_1300 PE=4 SV=1 | | 2 |
| 92 | 2.88 | 8.8 | | tr|Q4Q9B1|Q4Q9B1_ LEIMA | | Putative aspartate--ammonia ligase  OS=Leishmania major OX=5664 GN=LMJF_26_0830 PE=4 SV=1 | | 3 |
| 93 | 2.87 | 91.9 | | tr|E9AD01|E9AD01_ LEIMA | | Kinetoplast-associated protein-like protein OS=Leishmania major OX=5664 GN=LMJF_27_0240 PE=4  SV=1 | | 2 |
| 94 | 2.83 | 8.6 | | tr|Q4QH18|Q4QH18  _LEIMA | | Putative aminopeptidase  OS=Leishmania major OX=5664 GN=LMJF_11_0620 PE=4 SV=1 | | 2 |
| 95 | 2.66 | 10.6 | | tr|E9ADF0|E9ADF0_ LEIMA | | Uncharacterized protein OS=Leishmania major OX=5664  GN=LMJF_27_1730 PE=4 SV=1 | | 3 |
| 96 | 2.6 | 5.7 | | tr|Q4Q813|Q4Q813_ LEIMA | | Putative eukaryotic translation initiation factor OS=Leishmania major OX=5664 GN=LMJF_28_2500  PE=3 SV=1 | | 2 |
| 97 | 2.57 | 10.8 | | tr|Q4QI44|Q4QI44_L EIMA | | Uncharacterized protein  OS=Leishmania major OX=5664 GN=LMJF_08_1225 PE=4 SV=1 | | 3 |
| 98 | 2.47 | 5.6 | | tr|E9AEB3|E9AEB3_ LEIMA | | ATP-dependent 6- phosphofructokinase OS=Leishmania major OX=5664 GN=pfk PE=3 SV=1 | | 2 |
| 99 | 2.47 | 4.6 | | tr|Q4QAZ2|Q4QAZ2  _LEIMA | | Uncharacterized protein OS=Leishmania major OX=5664  GN=LMJF_23_1460 PE=4 SV=1 | | 2 |
| 100 | 2.44 | 12.1 | | tr|Q4Q1Y7|Q4Q1Y7  _LEIMA | | Eukaryotic translation initiation factor  6 OS=Leishmania major OX=5664 GN=EIF6 PE=3 SV=1 | | 2 |
| 101 | 2.42 | 15.5 | | tr|E9ACN6|E9ACN6  _LEIMA | | Putative inorganic pyrophosphatase OS=Leishmania major OX=5664  GN=LMJF_03_0910 PE=4 SV=1 | | 2 |
| 102 | 2.39 | 3.9 | | tr|Q4Q198|Q4Q198_ LEIMA | | 14-3-3 protein I OS=Leishmania  major OX=5664 GN=Lm 14-3-3 I PE=3 SV=1 | | 1 |
| 103 | 2.39 | 3.2 | | tr|Q4Q426|Q4Q426_ LEIMA | | Putative peptidase M20/M25/M40 OS=Leishmania major OX=5664 GN=LMJF_33_1610 PE=4 SV=1 | | 2 |
| 104 | 2.29 | 3 | | tr|E9AD64|E9AD64_ LEIMA | | Uncharacterized protein OS=Leishmania major OX=5664  GN=LMJF_27_0870 PE=4 SV=1 | | 2 |
| 105 | 2.2 | 3.1 | | tr|Q4QJG7|Q4QJG7_ LEIMA | | Trypanothione reductase  OS=Leishmania major OX=5664 GN=TRYR PE=3 SV=1 | | 1 |
| 106 | 2.12 | 14.1 | | tr|Q4Q7T9|Q4Q7T9_ LEIMA | | Putative 2-hydroxy-3-oxopropionate reductase OS=Leishmania major  OX=5664 GN=LMJF_30_0180 PE=4 SV=1 | | 3 |
| 107 | 2.07 | 2.6 | | tr|Q4QGE5|Q4QGE5  _LEIMA | | Metallo-peptidase, Clan MA(E), family 32 OS=Leishmania major OX=5664 GN=LMJF_13_0090 PE=4  SV=1 | | 1 |
| 108 | 2.02 | 9.3 | | tr|Q4Q1A9|Q4Q1A9  _LEIMA | | Putative ATP synthase  OS=Leishmania major OX=5664 GN=LMJF_36_3100 PE=4 SV=1 | | 2 |
| 109 | 2.01 | 4 | | tr|Q4QFT9|Q4QFT9_ LEIMA | | Uncharacterized protein OS=Leishmania major OX=5664  GN=LMJF_14_0450 PE=4 SV=1 | | 1 |
| 110 | 2 | 1.7 | | tr|Q4QJ42|Q4QJ42_L EIMA | | Putative glutamine synthetase OS=Leishmania major OX=5664  GN=LMJF_06_0370 PE=3 SV=1 | | 1 |
| 111 | 2 | 4.4 | | tr|Q4QF35|Q4QF35_ LEIMA | | Proliferating cell nuclear antigen  OS=Leishmania major OX=5664 GN=LMJF_15_1450 PE=3 SV=1 | | 1 |
| 112 | 2 | 5.9 | | tr|Q4QFY6|Q4QFY6  _LEIMA | | Pyrroline-5-carboxylate reductase  OS=Leishmania major OX=5664 GN=P5CR PE=3 SV=1 | | 1 |
| 113 | 2 | 11.9 | | tr|Q4QFV4|Q4QFV4  _LEIMA | | Proteasome subunit alpha type OS=Leishmania major OX=5664  GN=LMJF_14_0310 PE=3 SV=1 | | 2 |
| 114 | 2 | 2.6 | | tr|Q4QDX2|Q4QDX2  _LEIMA | | Citrate synthase OS=Leishmania  major OX=5664 GN=LMJF_18_0670 PE=3 SV=1 | | 1 |
| 115 | 2 | 0.5 | | tr|Q4QCD3|Q4QCD3  _LEIMA | | Uncharacterized protein OS=Leishmania major OX=5664 GN=LMJF_21_0800 PE=4 SV=1 | | 1 |
